# Supplementary material for: Oral Microbiota of Children Is Conserved across Han, Tibetan and Hui Groups and Is Correlated with Diet and Gut Microbiota
Source: MDPI journal article supplement (doi:10.3390/microorganisms9051030), 2021-05-11
Supplement: s1 [file s1]

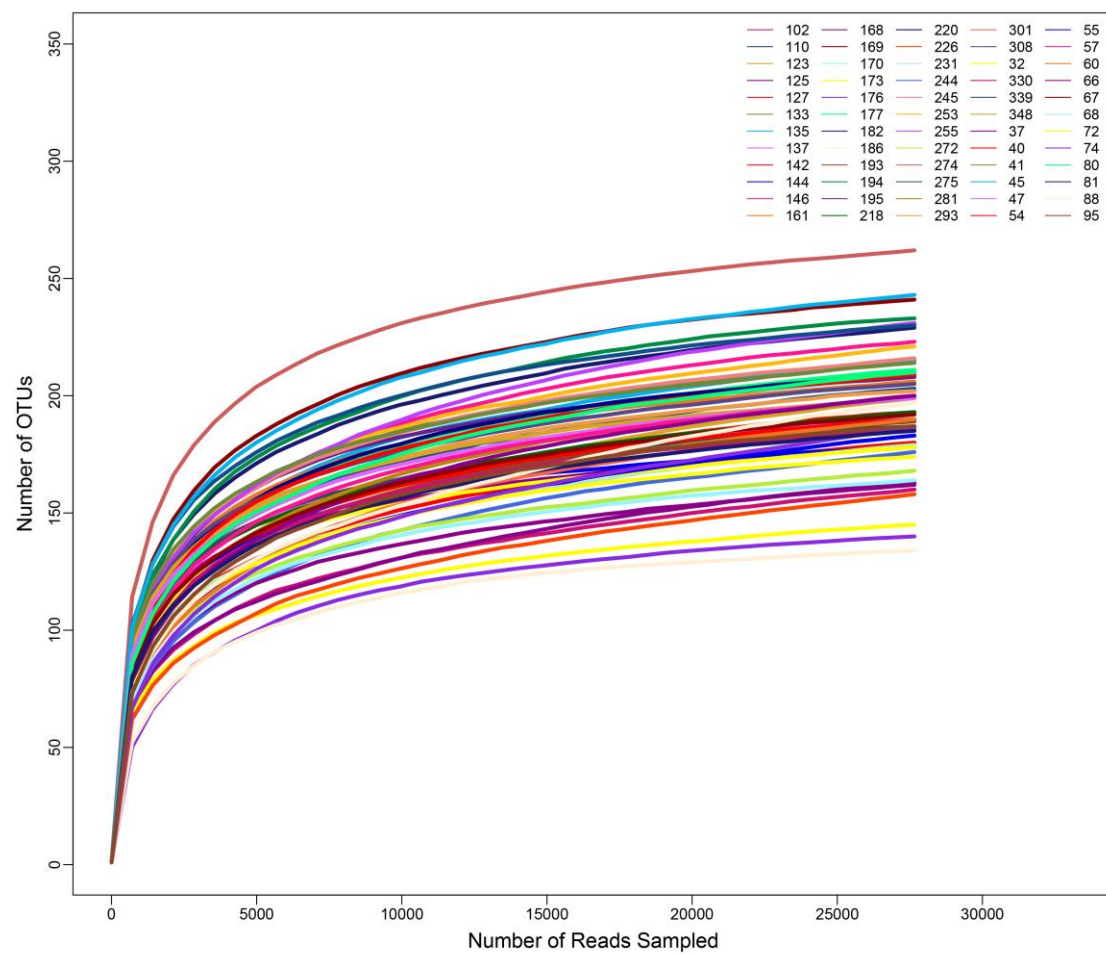

**Supplementary Figure 1.** Sample rarefaction curves.

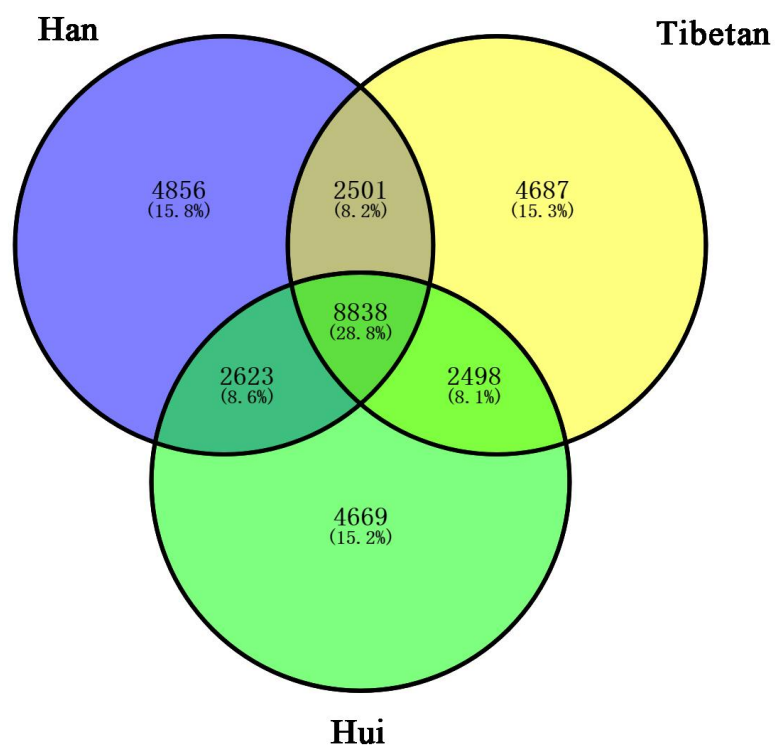

**Supplementary Figure 2.** Venn diagram at the OTU level. The overlaps represent the common taxa among different groups, and the non-overlapping portions represent unique taxa in each group.

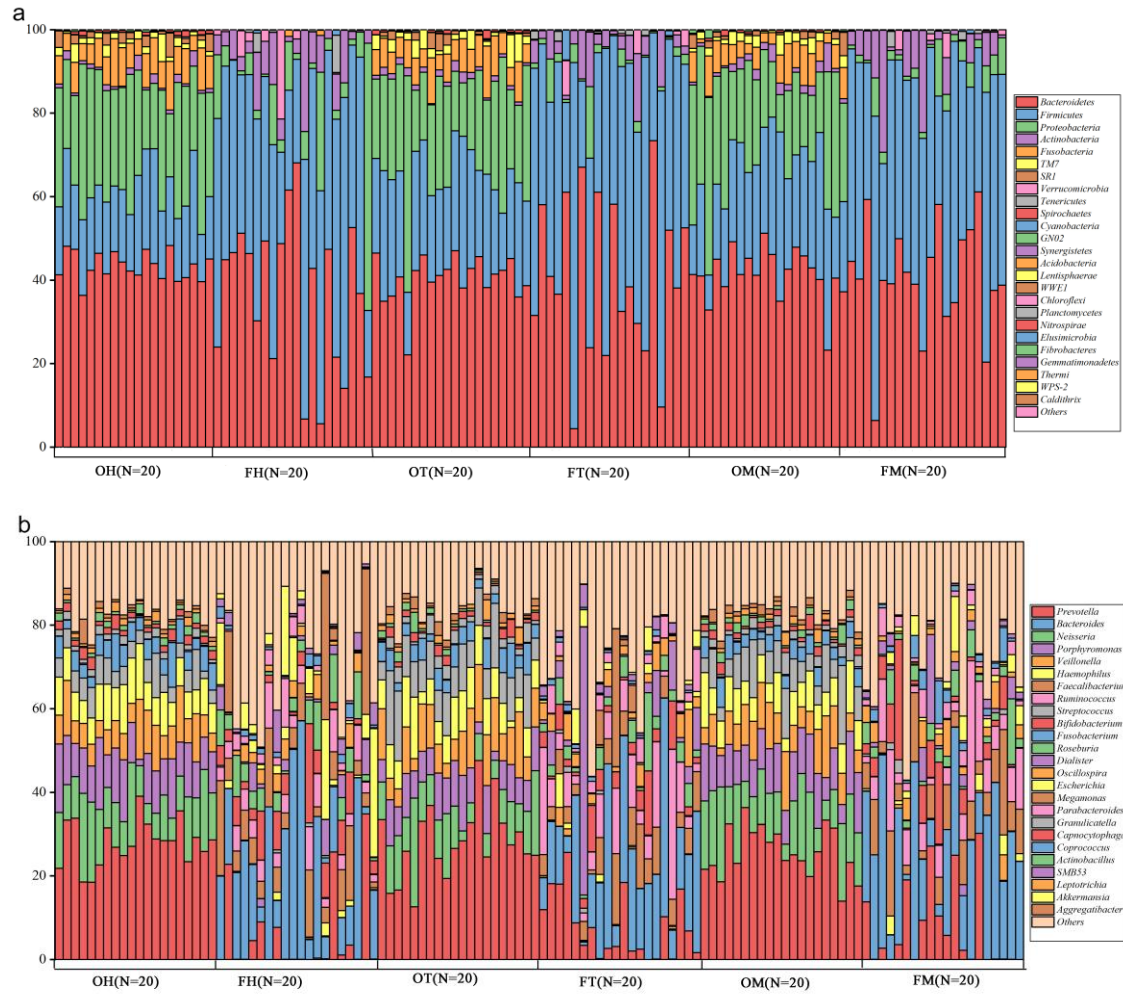

**Supplementary Figure 3.** Composition of oral and gut microbiota. (a) Results at the phylum level. (b) Results at the genus level.

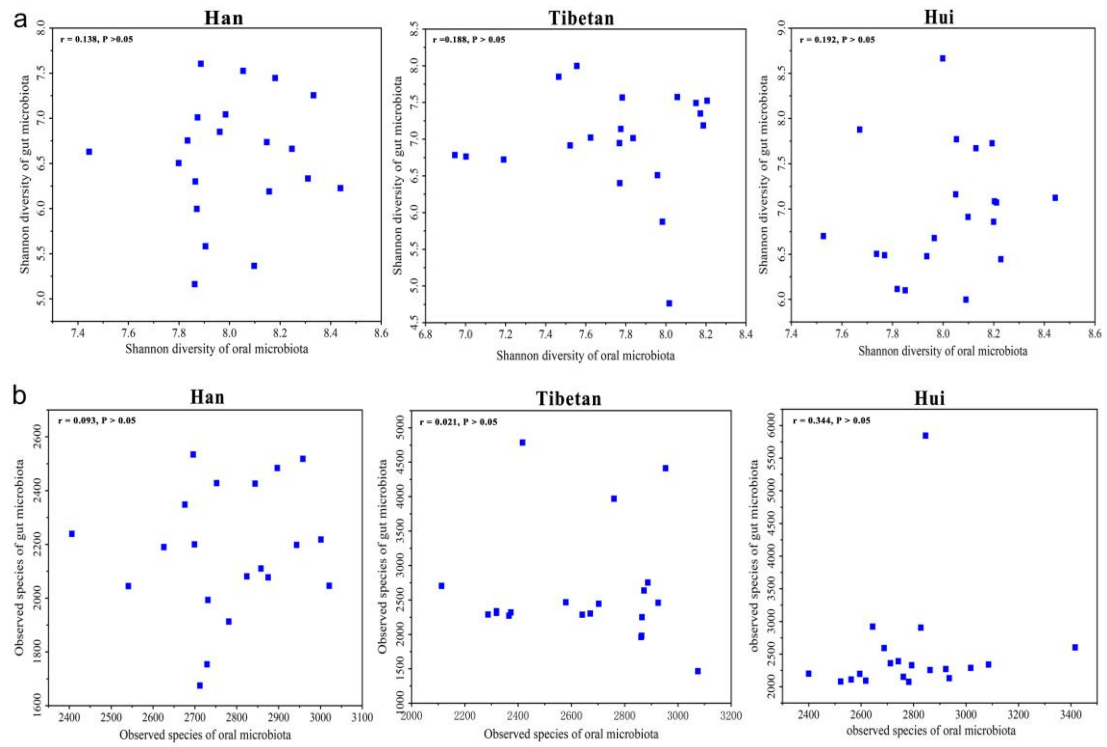

**Supplementary Figure 4.** Correlation between alpha diversity of oral and gut microbiota. (a) Shannon diversity. (b) Observed species.

**Supplementary Table 1.** Average daily food intake in the three ethnic groups.

| Food species   | Han (n = 20)           | Tibetan (n = 20)       | Hui (n = 20)           |
|----------------|------------------------|------------------------|------------------------|
|                | Intake (g)             | Intake (g)             | Intake (g)             |
| Grains         | 120.63(79.94 – 239.25) | 137.75(70.00 – 320.25) | 133.50(71.38 – 328.25) |
| Vegetables     | 114.14(40.06 – 262.38) | 73.87(44.62 – 258.32)  | 93.45(28.78 – 223.45)  |
| Fruits         | 157.71(58.09 – 269.64) | 77.00(32.80 – 266.55)  | 92.33(36.46 – 246.41)  |
| Poultry meat   | 6.61(2.41 – 12.30) *   | 0.22(0.00 – 6.00)      | 6.43(1.91 – 14.70) *   |
| Livestock meat | 17.22(4.15 – 23.92)    | 13.88(2.13 – 59.88)    | 12.58(3.31 – 69.00)    |
| Seafood        | 3.75(1.15 – 13.22)     | 1.13(0.00 – 11.94)     | 1.03(0.00 – 9.60)      |
| Milk           | 87.50(44.94 – 241.07)  | 91.00(50.00 – 317.75)  | 50.88(16.06 – 178.94)  |
| Beans          | 7.75(0.00 – 44.80)     | 10.87(0.00 – 44.25)    | 3.63(0.00 – 49.00)     |
| Eggs           | 8.52(0.00 – 16.10)     | 10.42(0.66 – 39.74)    | 8.90(0.10 – 30.09)     |
| Nuts           | 13.87(1.37 – 34.86)    | 9.78(1.49 – 29.58)     | 2.90(0.63 – 12.17)     |
| Condiments     | 106.63(25.24 – 216.76) | 61.13(17.13 – 145.93)  | 63.50(14.57 – 203.69)  |
| Sweets         | 11.13(3.13 – 27.94)    | 9.75(0.32 – 40.19)     | 7.25(2.69 – 46.88)     |

(Condiments included salt, vinegar, monosodium glutamate, pepper, soy sauce, and mustard.

\*compared with the Tibetan,  $P < 0.05$ ;  $P$  value was calculated using Kruskal–Wallis rank sum test)

**Supplementary Table 2.** Energy and mean percentage of energy from macro-nutrients among the three ethnic groups.

| Nutrient                | Han (n = 20)                  | Tibetan (n = 20)               | Hui (n = 20)                  |
|-------------------------|-------------------------------|--------------------------------|-------------------------------|
| Energy (kcal)           | 1975.04<br>(981.77 – 2609.50) | 2162.53<br>(1024.85 – 2861.62) | 2034.99<br>(892.97 – 3842.89) |
| Protein (% energy)      | 13.45 (10.61 – 16.08)         | 13.13 (12.26 – 15.27)          | 13.13 (11.02 – 15.89)         |
| Fat (% energy)          | 29.87 (25.66 – 40.27)         | 33.23 (28.85 – 39.08)          | 27.81 (15.87 – 36.60)         |
| Carbohydrate (% energy) | 55.32 (46.00 – 62.77)         | 51.55 (44.86 – 56.45)          | 61.46 (48.32 – 73.79)         |
