# Supplementary figures and images for: Oral Microbiota of Children Is Conserved across Han, Tibetan and Hui Groups and Is Correlated with Diet and Gut Microbiota
Source: MDPI journal article supplement (doi:10.3390/microorganisms9051030), 2021-05-11

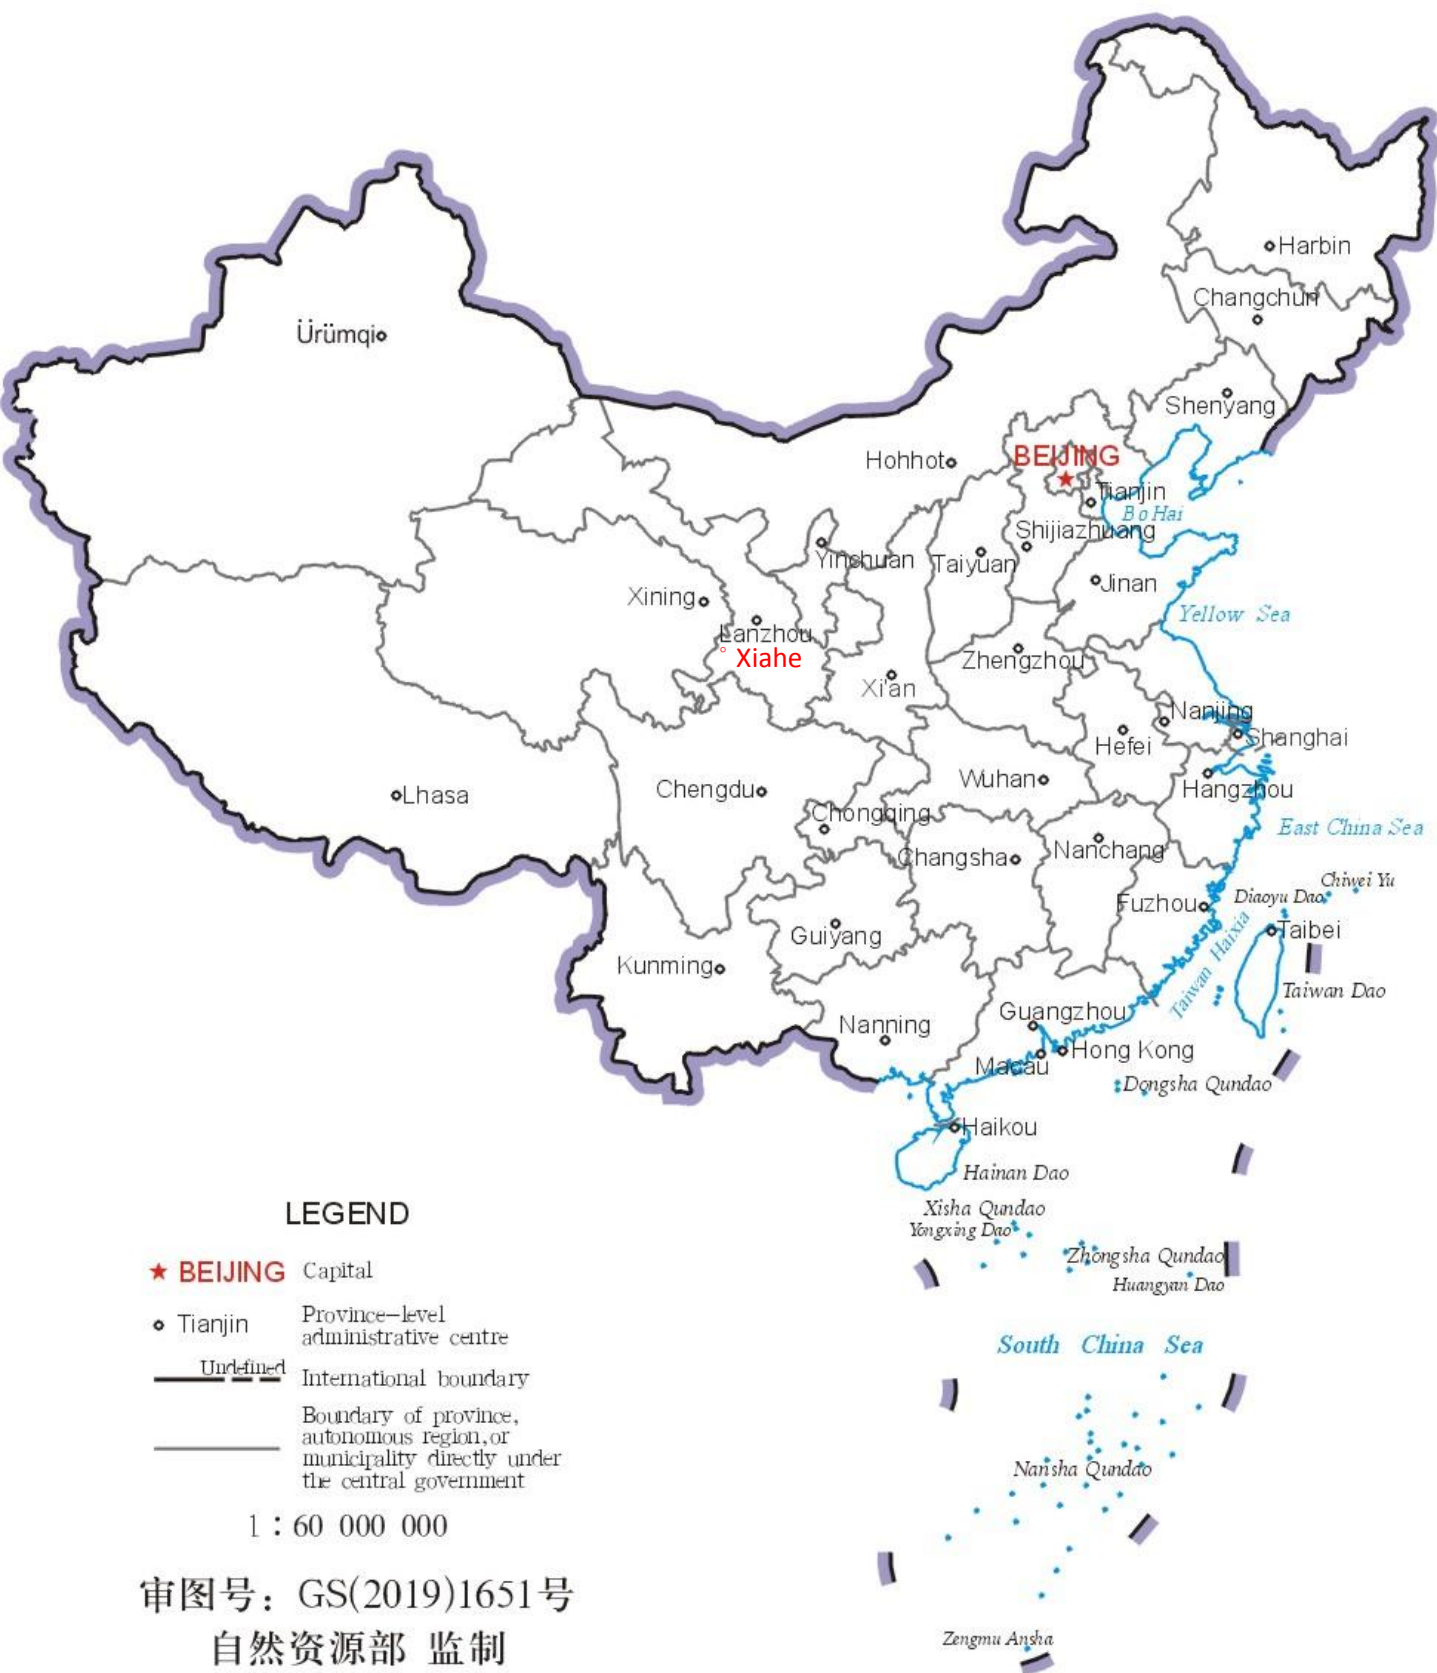

Supplement: s1 [file s1]
